# Supplementary material for: Effect of lithium and sodium ions on the size and morphology of ZnO nanoparticles synthesized by a glycerol–urea route
Source: Royal Society of Chemistry journal article supplement (doi:10.1039/c9nj04331d), 2019-01-01
Supplement: c9nj04331d1.pdf [file c9nj04331d1.pdf]

## Supporting Information

### Effect of lithium and sodium ions on size and morphology of ZnO nanoparticles synthesized by glycerol-urea route

Lorena Portela Brazuna<sup>a</sup>, Thiago Galeote Tabuti<sup>a</sup>, Adrielle de Paula Silva<sup>b</sup>, Dayane Batista Tada<sup>b</sup>, Mário José Politi<sup>c</sup>, Rebeca Bacani<sup>a</sup>, Eduardo Rezende Triboni<sup>\*a</sup>

<sup>a</sup> Escola de Engenharia de Lorena da Universidade de São Paulo, Departamento de Engenharia Química (DEQUI). Estrada Municipal do Campinho, s/n° CEP 12.602-810, Lorena, SP - Brazil.

Tel: 55-12- 3159-5000.

<sup>b</sup> Universidade Federal de São Paulo, Campus São José dos Campos (UNIFESP-SJC). Rua Talim, no 1201, São José dos Campos – Brazil.

<sup>c</sup> Laboratory of Photochemistry and Fast Kinetics Biochemistry and Chemistry Departments, Institute of Chemistry, Av. Prof. Lineu Prestes, 748, São Paulo, SP – Brazil.

*\*Corresponding Author.*

E-mail: [tribonier@usp.br](mailto:tribonier@usp.br)

**ZnO NPs obtained at 10 °C**

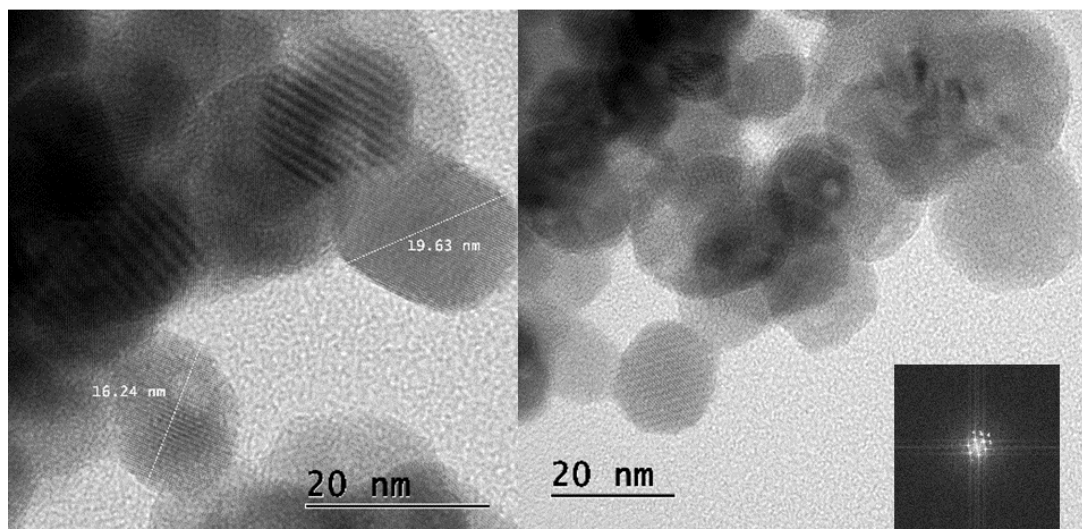

**ZnO NPs obtained at 40 °C**

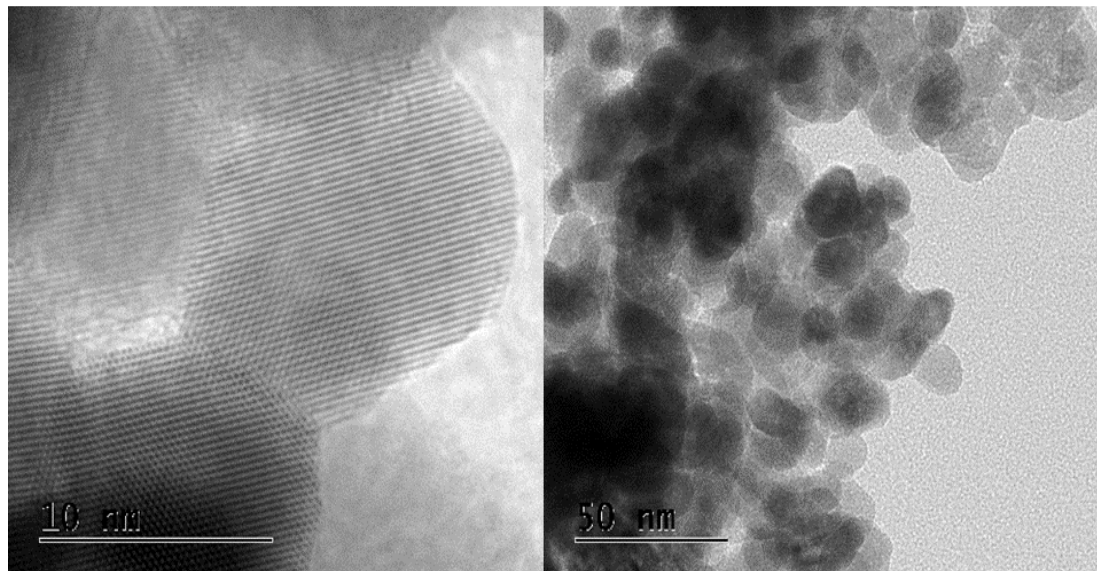

**Figure SI-1.** Preparation of the ZnO at 40 °C and 10 °C.

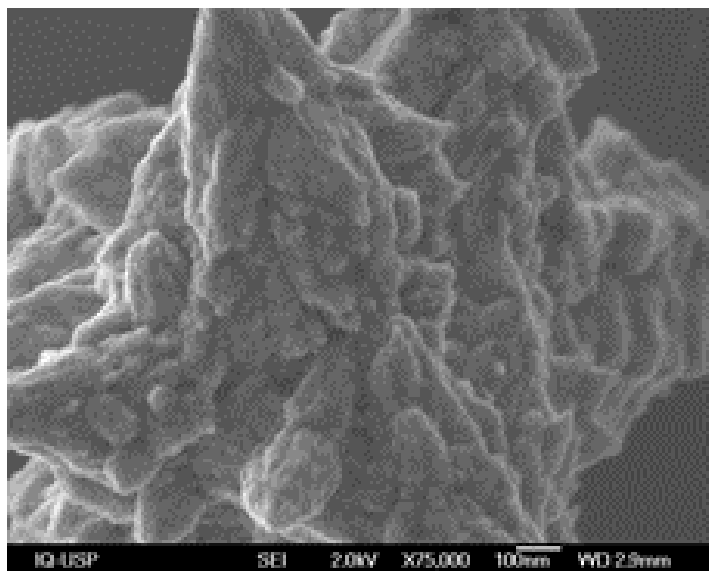

**Figure SI-2.** ZnO nanoparticles obtained in a higher concentration of NaOH: the ratio of  $\text{Zn}^{2+}/\text{OH}$  precursor is greater than 1:4 mol.

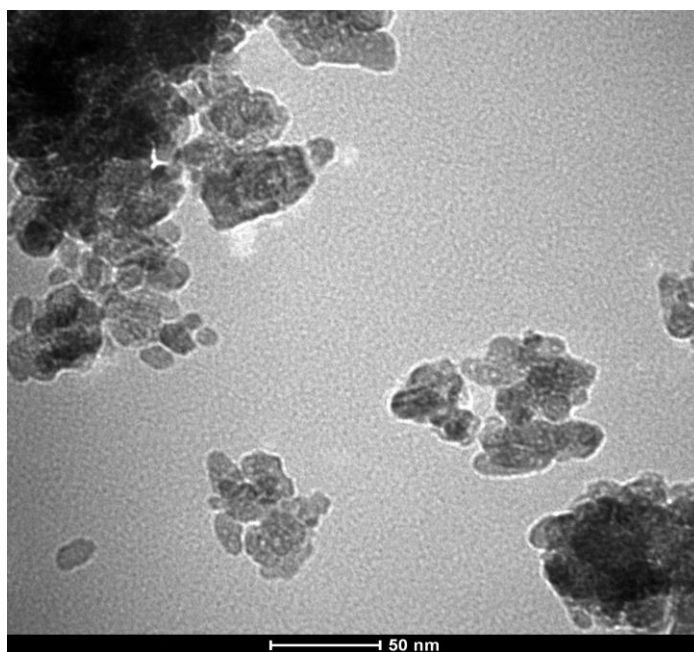

**Figure SI-3.** ZnO nanoparticles obtained when the ratio of glycerol/urea is 10:1; ZnO particles start to get irregular and to grow in larger sizes.

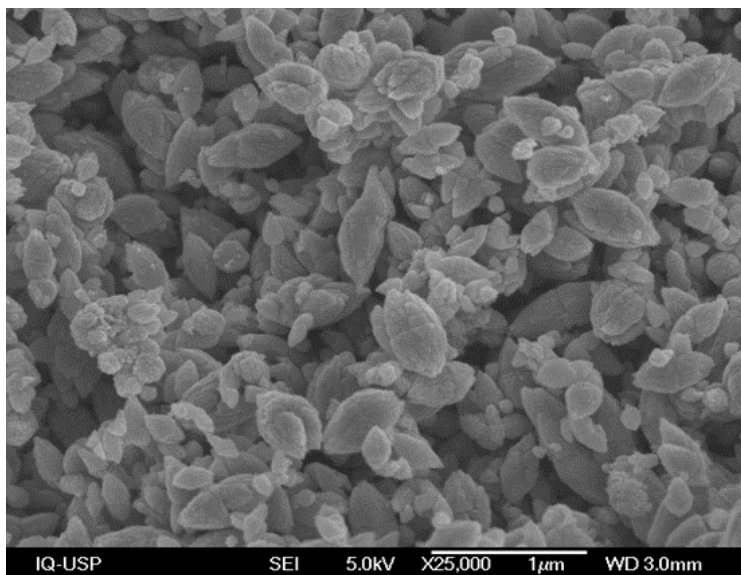

**Figure SI-4.** ZnO nanoparticles obtained only in glycerol-water at the temperature of 70 °C. It can see the spindle shape of the particles in the micrometric domain.
